# Supplementary material
Source: MDPI journal article supplement (https://www.mdpi.com/2311-553X/10/2/23)
Supplement: s1 [file s1]

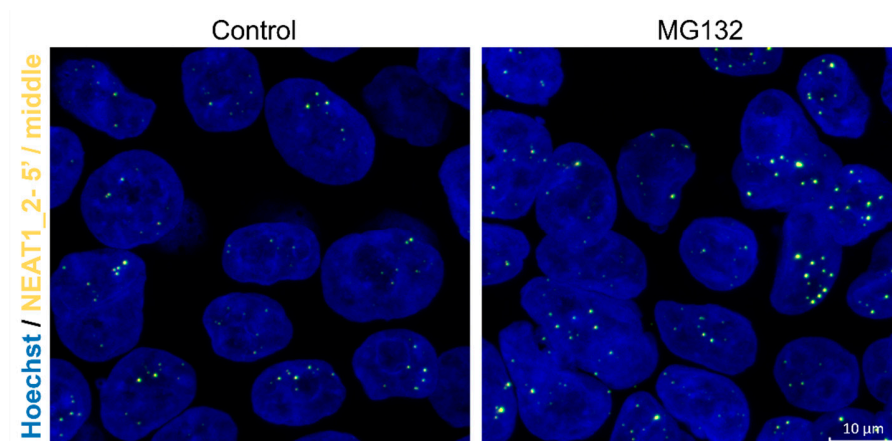

**Supplementary Figure S1. Proteasome Inhibitor MG132 increases NEAT1\_2 in HEK293T cells.** Proteasome inhibition was used as a reference for stress experiments because it is known to increase NEAT1\_2 expression. After 4hrs of MG132 treatment, an apparent increase was observed in nuclear NEAT1\_2 foci with smFISH experiments.

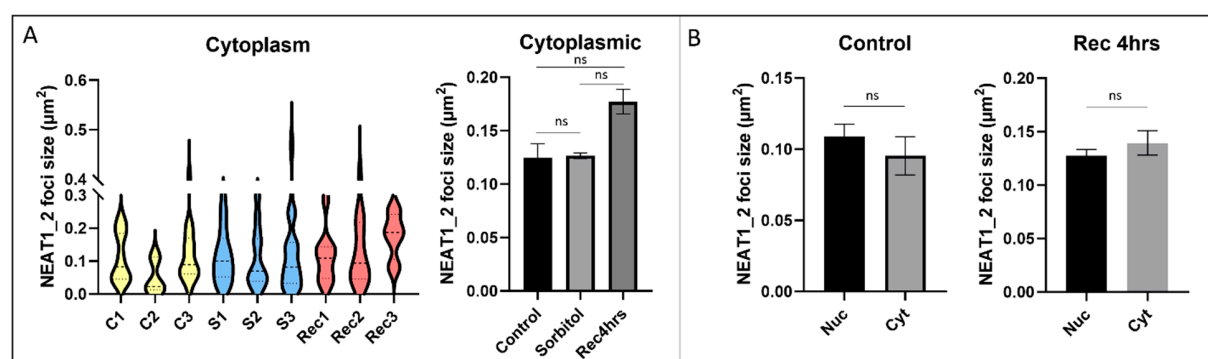

**Supplementary Figure S2. Size of NEAT1\_2 foci in cytoplasm shows no difference between conditions of control, osmotic stress and recovery.** (A) No significant difference was observed in size of cytoplasmic NEAT1\_2 foci between different conditions. (B) Size of NEAT1\_2 foci in the nucleus and the cytoplasm show no difference under conditions of control and recovery.

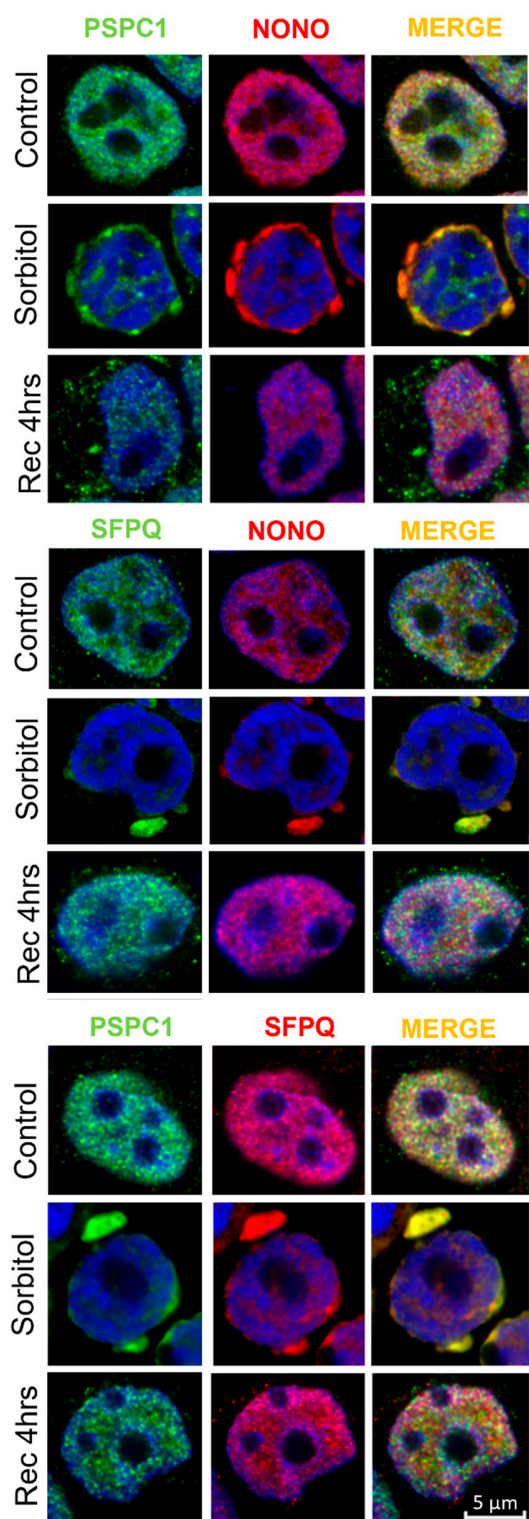

**Supplementary Figure S3. Extended data for Figure 4.** Separated channels show the individual localization of PSPC1, NONO, and SFPQ in HEK293T cells under conditions of control, osmotic stress, and recovery. Osmotic stress induces the formation of cytoplasmic aggregation of PSPs together.

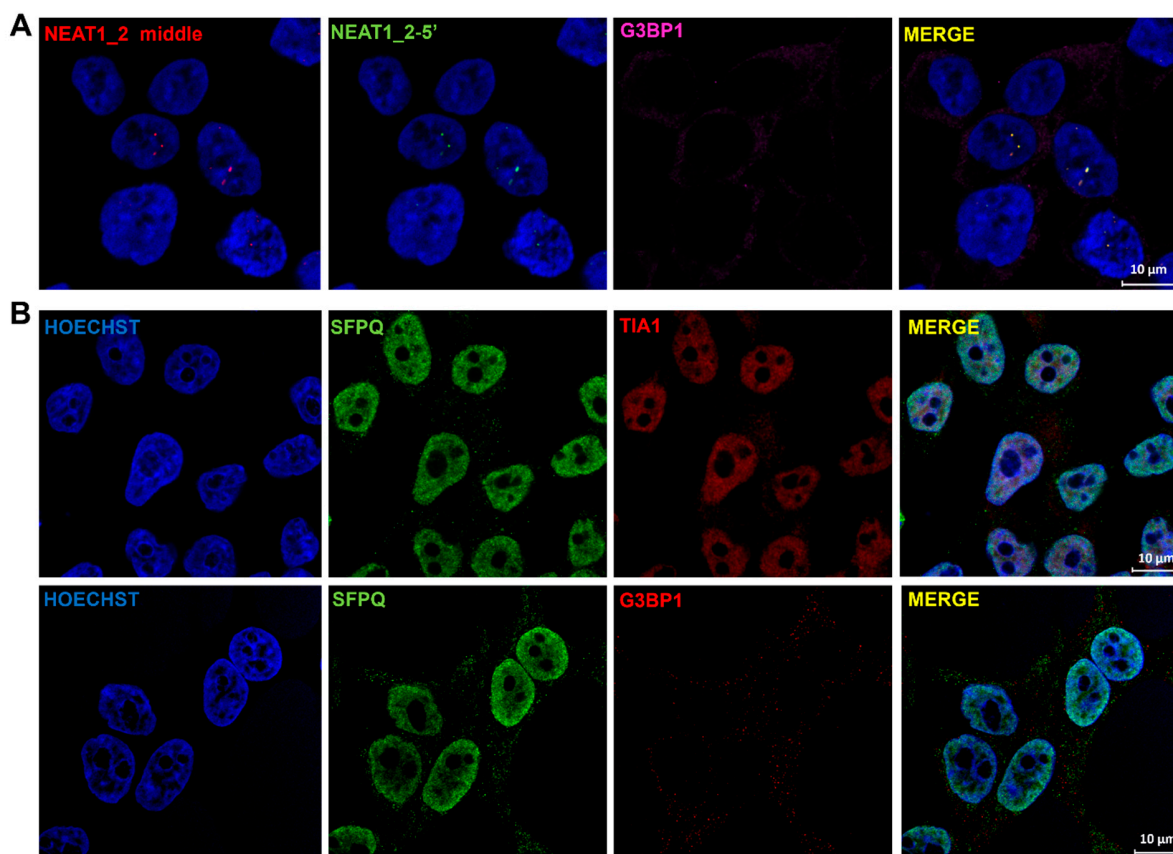

**Supplementary Figure S4. Subcellular localization of SG markers under control conditions.** No SG formation and colocalization of SG markers with NEAT1\_2 (A) and PSPs (B) were observed in the cytoplasm in the control samples.

**Supplementary Table S1.** Size distribution of NEAT1\_2 foci in groups and subcellular compartments

|          | Mean  |       | Range |       | IQR*  |       |
|----------|-------|-------|-------|-------|-------|-------|
|          | Nuc   | Cyt   | Nuc   | Cyt   | Nuc   | Cyt   |
| Control  | 0.108 | 0.125 | 1.071 | 0.378 | 0.108 | 0.118 |
| Sorbitol | 0.061 | 0.127 | 0.462 | 0.465 | 0.078 | 0.120 |
| Rec4hrs  | 0.128 | 0.177 | 0.964 | 0.377 | 0.129 | 0.141 |

\*IQR: Interquartile range
